# Supplementary material for: How does burnout affect physician productivity? A systematic literature review
Source: PubMed Central journal article supplement (PMC4119057; doi:10.1186/1472-6963-14-325), 2014-07-28
Supplement: 1472-6963-14-325-S1.pdf [file 1472-6963-14-325-S1.pdf]

## Search terms used in search strategy

| Database           | Search Terms                                                                                                                                                                                                                                                                                                                                                                                                                                                                                                                                                                                                                                                                                                                                                                                                                                                                                                                                                                                                                                                                                                                                                                                                                                                                                                                                                                          |
|--------------------|---------------------------------------------------------------------------------------------------------------------------------------------------------------------------------------------------------------------------------------------------------------------------------------------------------------------------------------------------------------------------------------------------------------------------------------------------------------------------------------------------------------------------------------------------------------------------------------------------------------------------------------------------------------------------------------------------------------------------------------------------------------------------------------------------------------------------------------------------------------------------------------------------------------------------------------------------------------------------------------------------------------------------------------------------------------------------------------------------------------------------------------------------------------------------------------------------------------------------------------------------------------------------------------------------------------------------------------------------------------------------------------|
| Medline Current    | <p>[exp Burnout, Professional/ OR burnout.mp. OR (burnout adj3 effect*).mp.] <b>AND</b> [exp Physicians/ OR exp Psychiatry/ OR allergist*.mp. OR anesthesiologist*.mp. OR cardiologist*.mp. OR clinical pharmacologist*.mp. OR clinical toxicologist*.mp. OR dermatologist*.mp. OR doctor*.mp. OR endocrinologist*.mp. OR gastroenterologist*.mp. OR gynecologist*.mp. OR hematologist*.mp. OR immunologist*.mp. OR medical biochemist*.mp. OR medical geneticist*.mp. OR medical microbiologist*.mp. OR nephrologist*.mp. OR neurologist*.mp. OR neuropathologist*.mp. OR neuroradiologist*.mp. OR occupational physician*.mp. OR oncologist*.mp. OR ophthalmologist*.mp. OR pathologist*.mp. OR pediatrician*.mp. OR physician*.mp. OR psychiatrist*.mp. OR radiologist*.mp. OR rheumatologist*.mp. OR surgeon*.mp. OR urologist*.mp.] <b>AND</b> [exp Professional Impairment/ OR exp Sick Leave/ OR exp Absenteeism/ OR exp Personnel Turnover/ OR exp Workload/ OR exp Patient Care Management/ OR (impair* adj3 physician*).mp. OR (impair* adj3 doctor*).mp. OR (sick* adj3 day*).mp. OR (sick* adj3 leave*).mp. OR (illness adj3 day*).mp. OR quit*.mp. OR (patient adj3 volume*).mp. OR (patient adj3 load*).mp. OR (patient* adj3 care).mp. OR (patient* adj3 caring).mp. OR presenteeism*.mp. OR turnover*.mp. OR workload*.mp.]</p>                                       |
| Medline In-process | <p>[exp Burnout, Professional/ OR burnout.mp. OR (burnout adj3 effect*).mp.] <b>AND</b> [exp Physicians/ OR exp Psychiatry/ OR allergist*.mp. OR anesthesiologist*.mp. OR cardiologist*.mp. OR clinical pharmacologist*.mp. OR clinical toxicologist*.mp. OR dermatologist*.mp. OR doctor*.mp. OR endocrinologist*.mp. OR gastroenterologist*.mp. OR gynecologist*.mp. OR hematologist*.mp. OR immunologist*.mp. OR medical biochemist*.mp. OR medical geneticist*.mp. OR medical microbiologist*.mp. OR nephrologist*.mp. OR neurologist*.mp. OR neuropathologist*.mp. OR neuroradiologist*.mp. OR occupational physician*.mp. OR oncologist*.mp. OR ophthalmologist*.mp. OR pathologist*.mp. OR pediatrician*.mp. OR physician*.mp. OR psychiatrist*.mp. OR radiologist*.mp. OR rheumatologist*.mp. OR surgeon*.mp. OR urologist*.mp.] <b>AND</b> [exp Professional Impairment/ OR exp Sick Leave/ OR exp Absenteeism/ OR exp Personnel Turnover/ OR exp Workload/ OR exp Patient Care Management/ OR (impair* adj3 physician*).mp. OR (impair* adj3 doctor*).mp. OR (sick* adj3 day*).mp. OR (sick* adj3 leave*).mp. OR (illness adj3 day*).mp. OR quit*.mp. OR (patient adj3 volume*).mp. OR (patient adj3 load*).mp. OR (patient* adj3 care).mp. OR (patient* adj3 caring).mp. OR presenteeism*.mp. OR turnover*.mp. OR workload*.mp.]</p>                                       |
| PsycINFO           | <p>[burnout.mp. OR (burnout adj3 effect*).mp.] <b>AND</b> [exp physicians/ OR exp clinicians/ OR exp Psychiatry/ OR allergist*.mp. OR anesthesiologist*.mp. OR cardiologist*.mp. OR clinical pharmacologist*.mp. OR clinical toxicologist*.mp. OR dermatologist*.mp. OR doctor*.mp. OR endocrinologist*.mp. OR gastroenterologist*.mp. OR gynecologist*.mp. OR hematologist*.mp. OR immunologist*.mp. OR medical biochemist*.mp. OR medical geneticist*.mp. OR medical microbiologist*.mp. OR nephrologist*.mp. OR neurologist*.mp. OR neuropathologist*.mp. OR neuroradiologist*.mp. OR occupational physician*.mp. OR oncologist*.mp. OR ophthalmologist*.mp. OR pathologist*.mp. OR pediatrician*.mp. OR physician*.mp. OR psychiatrist*.mp. OR radiologist*.mp. OR rheumatologist*.mp. OR surgeon*.mp. OR urologist*.mp.] <b>AND</b> [exp impaired professionals/ OR exp employee leave benefits/ OR exp employee absenteeism/ OR absenteeism*.mp. OR exp employee turnover/ OR exp work load/ OR (patient* adj3 car* adj3 manag*).mp. OR (impair* adj3 physician*).mp. OR (impair* adj3 doctor*).mp. OR (sick* adj3 day*).mp. OR (sick* adj3 leave*).mp. OR (illness adj3 day*).mp. OR quit*.mp. OR (patient adj3 volume*).mp. OR (patient adj3 load*).mp. OR (patient* adj3 care).mp. OR (patient* adj3 caring).mp. OR presenteeism*.mp. OR turnover*.mp. OR workload*.mp.]</p> |

| Database       | Search Terms                                                                                                                                                                                                                                                                                                                                                                                                                                                                                                                                                                                                                                                                                                                                                                                                                                                                                                                                                                                                                                                                                                                                                                                                                                                                         |
|----------------|--------------------------------------------------------------------------------------------------------------------------------------------------------------------------------------------------------------------------------------------------------------------------------------------------------------------------------------------------------------------------------------------------------------------------------------------------------------------------------------------------------------------------------------------------------------------------------------------------------------------------------------------------------------------------------------------------------------------------------------------------------------------------------------------------------------------------------------------------------------------------------------------------------------------------------------------------------------------------------------------------------------------------------------------------------------------------------------------------------------------------------------------------------------------------------------------------------------------------------------------------------------------------------------|
| Embase         | <p>[exp Burnout/ OR burnout.mp. OR (burnout adj3 effect*).mp.] <b>AND</b> [exp Physicians/ OR exp Psychiatry/ OR allergist*.mp. OR anesthesiologist*.mp. OR cardiologist*.mp. OR clinical pharmacologist*.mp. OR clinical toxicologist*.mp. OR dermatologist*.mp. OR doctor*.mp. OR endocrinologist*.mp. OR gastroenterologist*.mp. OR gynecologist*.mp. OR hematologist*.mp. OR immunologist*.mp. OR medical biochemist*.mp. OR medical geneticist*.mp. OR medical microbiologist*.mp. OR nephrologist*.mp. OR neurologist*.mp. OR neuropathologist*.mp. OR neuroradiologist*.mp. OR occupational physician*.mp. OR oncologist*.mp. OR ophthalmologist*.mp. OR pathologist*.mp. OR pediatrician*.mp. OR physician*.mp. OR psychiatrist*.mp. OR radiologist*.mp. OR rheumatologist*.mp. OR surgeon*.mp. OR urologist*.mp.] <b>AND</b> [exp medical leave/ OR exp Absenteeism/ OR exp turnover time/ OR exp Workload/ OR exp patient care/ OR (impair* adj3 physician*).mp. OR (impair* adj3 doctor*).mp. OR (sick* adj3 day*).mp. OR (sick* adj3 leave*).mp. OR (illness adj3 day*).mp. OR quit*.mp. OR (patient adj3 volume*).mp. OR (patient adj3 load*).mp. OR (patient* adj3 care).mp. OR (patient* adj3 caring).mp. OR presenteeism*.mp. OR turnover*.mp. OR workload*.mp.]</p> |
| Web of Science | <p>[burnout*] <b>AND</b> [physician* OR clinician* OR Psychiatry OR allergist* OR anesthesiologist* OR cardiologist* OR clinical pharmacologist* OR clinical toxicologist* OR dermatologist* OR doctor* OR endocrinologist* OR gastroenterologist* OR gynecologist* OR hematologist* OR immunologist* OR medical biochemist* OR medical geneticist* OR medical microbiologist* OR nephrologist* OR neurologist* OR neuropathologist* OR neuroradiologist* OR occupational physician* OR oncologist* OR ophthalmologist* OR pathologist* OR pediatrician* OR physician* OR psychiatrist* OR radiologist* OR rheumatologist* OR surgeon* OR urologist*] <b>AND</b> [professional impair* OR impair* preffessional* OR sick leav* OR exp employ* leave benefit* OR absen* OR turnover* OR workload* OR work load* OR patient* car* manag* OR impair* physician* OR impair* doctor* OR sick* day* OR sick* leave* OR illness day* OR quit* OR patient* volume* OR patient* load* OR patient* care* OR patient* caring OR presenteeism*]</p>                                                                                                                                                                                                                                              |
